# Supplementary material
Source: publisher site journal article supplement (https://www.dovepress.com/article/447526)
Supplement: Supplementary file 1 [file get_supplementary_file.php]

**Appendix 1** Images associated with dental treatment

a. Dental instruments

|                                                                                     |                                                                                     |                                                                                      |                                                                                      |
|-------------------------------------------------------------------------------------|-------------------------------------------------------------------------------------|--------------------------------------------------------------------------------------|--------------------------------------------------------------------------------------|
|    |    |    |   |
| 1. Dressing tweezers                                                                | 2. Filling instrument                                                               | 3. Extraction forceps                                                                | 4. 3-way syringe                                                                     |
|    |    |    |   |
| 5. Dental mirror                                                                    | 6. Explorer                                                                         | 7. Scissors                                                                          | 8. Saliva ejector                                                                    |
|   |   |   |  |
| 9. Syringe                                                                          | 10. Toothbrush                                                                      | 11. Excavator                                                                        | 12. Suture needle                                                                    |
|  |  |  |                                                                                      |
| 13. Dental turbine                                                                  | 14. Scalpel                                                                         | 15. Interdental brush                                                                |                                                                                      |

b. Dental procedures

|                                                                                     |                                                                                     |                                                                                      |                                                                                       |
|-------------------------------------------------------------------------------------|-------------------------------------------------------------------------------------|--------------------------------------------------------------------------------------|---------------------------------------------------------------------------------------|
|  |  |  |  |
| 16. Impression                                                                      | 17. Flossing                                                                        | 18. Suture                                                                           | 19. Drilling                                                                          |
|  |  |  |  |
| 20. Tooth brushing                                                                  | 21. Tooth extraction                                                                | 22. Administration of local anesthesia                                               | 23. Scene of dental treatment                                                         |

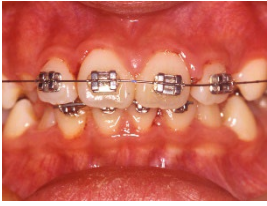

24. Orthodontic treatment

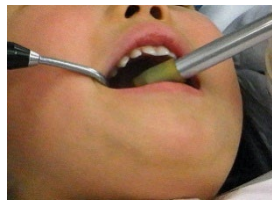

25. Salivary suction

c. Dental environments

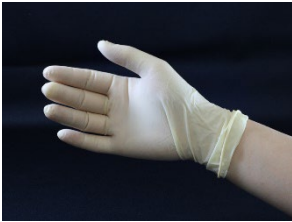

26. Dental glove

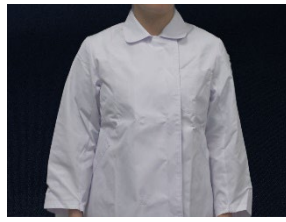

27. White coat

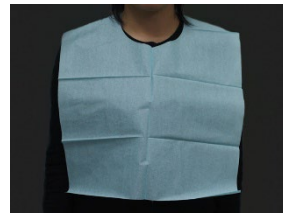

28. Patient bib

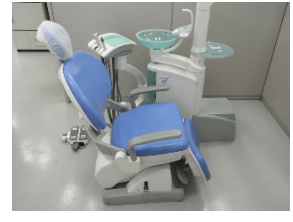

29. Dental chair

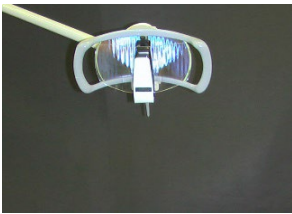

30. Dental light

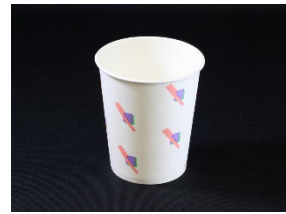

31. Paper cup

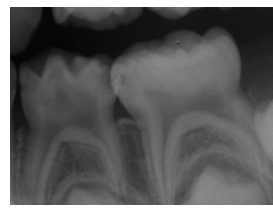

32. Dental radiograph
